# Supplementary figures and images for: Identification of colon adenocarcinoma necroptosis subtypes and tumor antigens for the development of mRNA vaccines
Source: PubMed Central journal article supplement — Heliyon. 2024 Jun 7;10(12):e32531. doi: 10.1016/j.heliyon.2024.e32531 (PMC11215264; doi:10.1016/j.heliyon.2024.e32531), 2024-06-07

**A****BAX**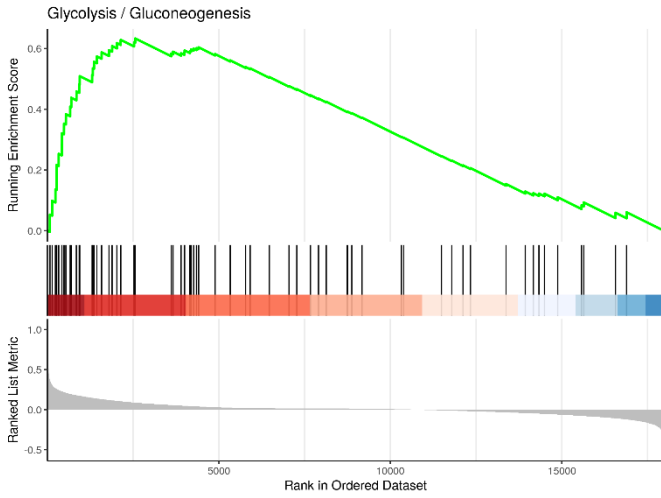**B****IL1B**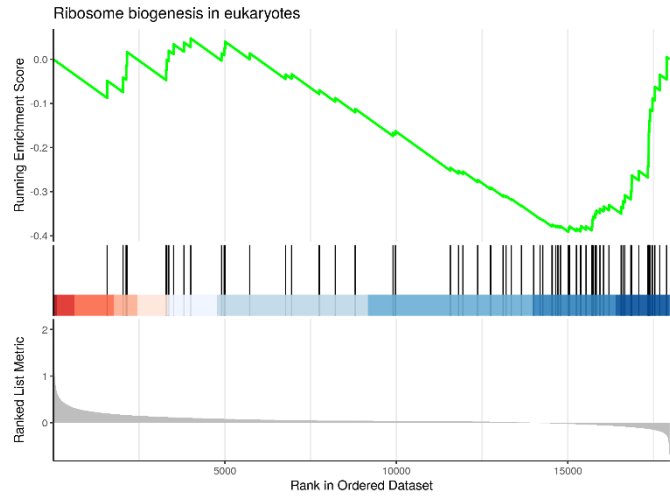**BAX**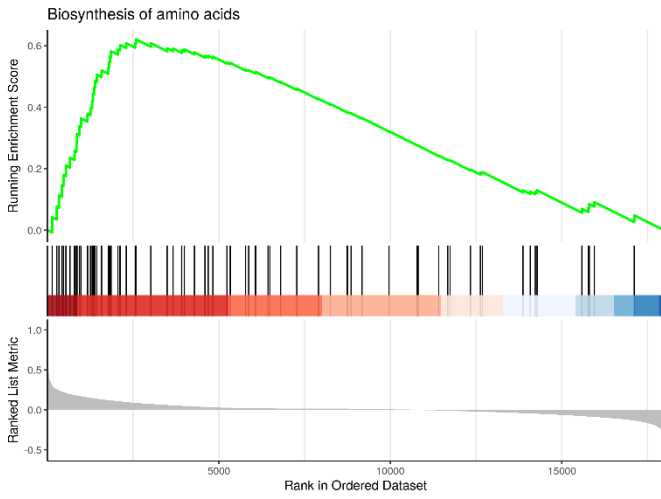**IL1B**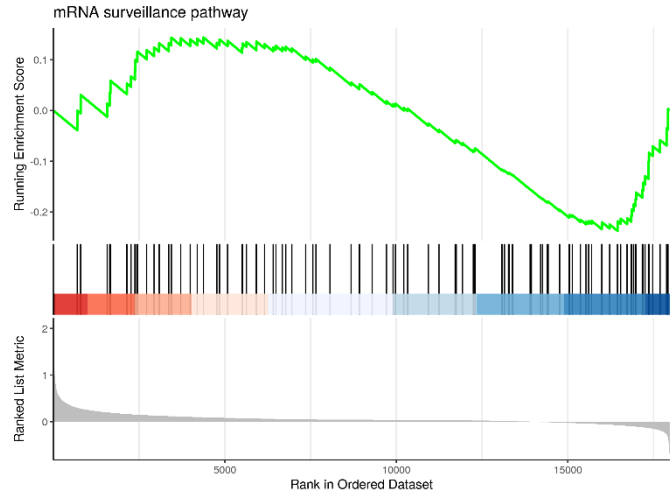**BAX**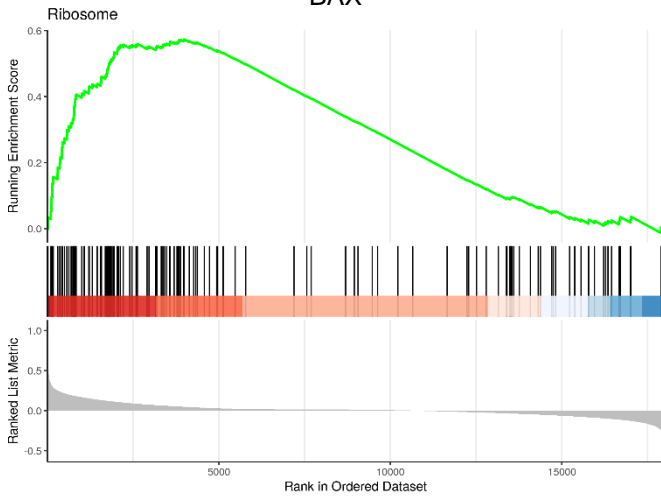**IL1B**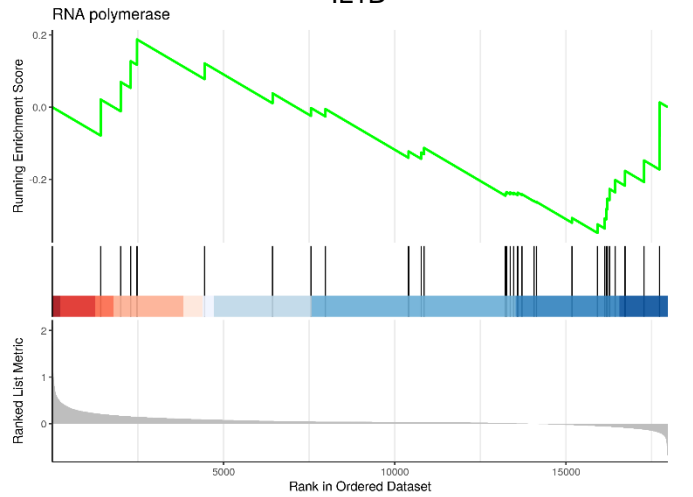

Supplement: mmc3.pdf [file mmc3.pdf]

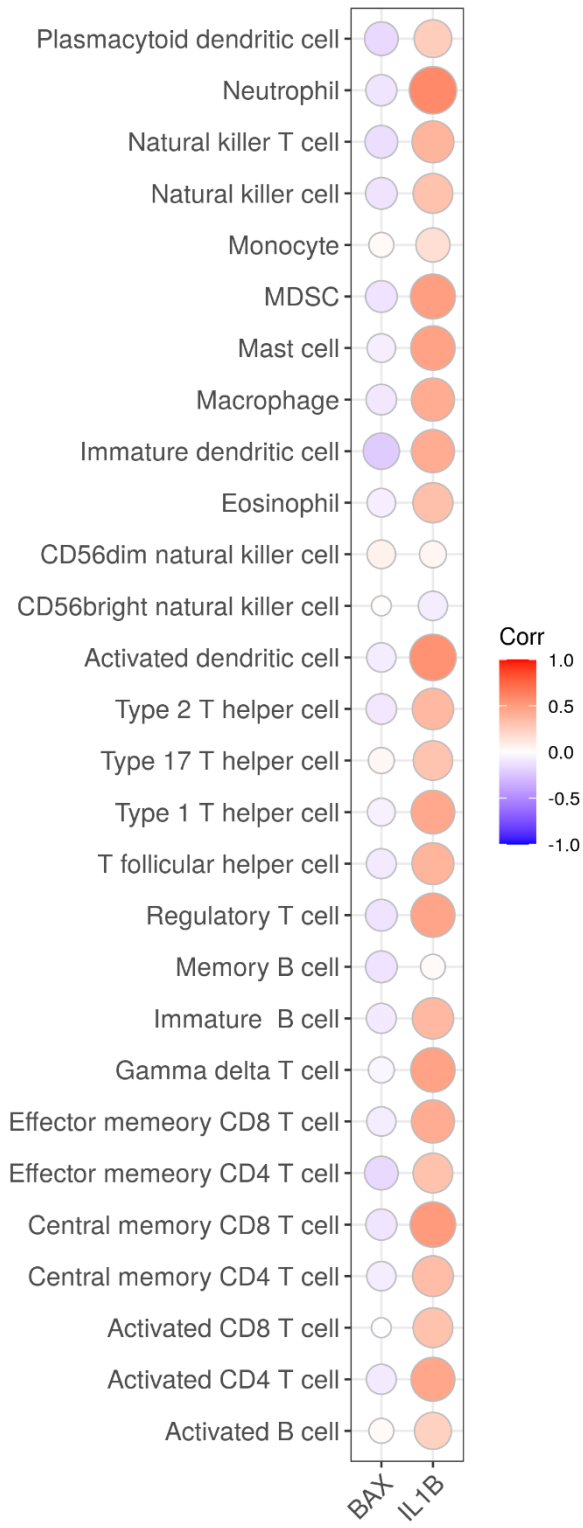

Supplement: mmc4.pdf [file mmc4.pdf]
